# Supplementary material
Source: HighWire-hosted journal article supplement (https://www.annals.org/content/suppl/2006/09/27/145.7.488)
Supplement: zai019062195A001.pdf [file zai019062195A001.pdf]

# Malpractice Insurers Medical Error Prevention Study

## 1. ADMINISTRATIVE SCREENING DATA FORM

**Subject Number (FOR OFFICE USE ONLY)**











**Date of Review**









**Insurance Company Code Number**











**Claim Number**

















**Reviewer ID #**




1. Was the incident reported to the insurer prior to the claim being asserted?
  - Yes
  - No
  - ND
  
2. Please categorize each **clinician** defendant named.  
(See specialty code list)

| Defendant(s)           | Specialty Code                                                                                                  | Year Completed Specialty Training                                                                               |
|------------------------|-----------------------------------------------------------------------------------------------------------------|-----------------------------------------------------------------------------------------------------------------|
| Clinician Defendant #1 | <input type="text"/> <input type="text"/> <input type="text"/> <input type="text"/><br><input type="radio"/> ND | <input type="text"/> <input type="text"/> <input type="text"/> <input type="text"/><br><input type="radio"/> ND |
| Clinician Defendant #2 | <input type="text"/> <input type="text"/> <input type="text"/> <input type="text"/><br><input type="radio"/> ND | <input type="text"/> <input type="text"/> <input type="text"/> <input type="text"/><br><input type="radio"/> ND |
| Clinician Defendant #3 | <input type="text"/> <input type="text"/> <input type="text"/> <input type="text"/><br><input type="radio"/> ND | <input type="text"/> <input type="text"/> <input type="text"/> <input type="text"/><br><input type="radio"/> ND |
| Clinician Defendant #4 | <input type="text"/> <input type="text"/> <input type="text"/> <input type="text"/><br><input type="radio"/> ND | <input type="text"/> <input type="text"/> <input type="text"/> <input type="text"/><br><input type="radio"/> ND |
| Clinician Defendant #5 | <input type="text"/> <input type="text"/> <input type="text"/> <input type="text"/><br><input type="radio"/> ND | <input type="text"/> <input type="text"/> <input type="text"/> <input type="text"/><br><input type="radio"/> ND |
| Clinician Defendant #6 | <input type="text"/> <input type="text"/> <input type="text"/> <input type="text"/><br><input type="radio"/> ND | <input type="text"/> <input type="text"/> <input type="text"/> <input type="text"/><br><input type="radio"/> ND |

3. Please categorize each **facility** defendant named.

| Defendant(s) | Facility type                                                                                                                                                                                             |
|--------------|-----------------------------------------------------------------------------------------------------------------------------------------------------------------------------------------------------------|
| Facility #1  | <input type="radio"/> Hospital – inpatient<br><input type="radio"/> Outpatient / clinic<br><input type="radio"/> Ambulatory surgery<br><input type="radio"/> Physician office<br><input type="radio"/> ND |
| Facility #2  | <input type="radio"/> Hospital – inpatient<br><input type="radio"/> Outpatient / clinic<br><input type="radio"/> Ambulatory surgery<br><input type="radio"/> Physician office<br><input type="radio"/> ND |
| Facility #3  | <input type="radio"/> Hospital – inpatient<br><input type="radio"/> Outpatient / clinic<br><input type="radio"/> Ambulatory surgery<br><input type="radio"/> Physician office<br><input type="radio"/> ND |

No facility defendant evident

4. Date claim initiated:

□□/□□/□□□□

ND

5. Date of occurrence (loss date) of treatment or management that allegedly led to injury:

□□/□□/□□□□

ND

6. **TOTAL expenses:**  
(i.e. sum of expenses accrued on behalf of all defendant(s) insured by your company—excluding payment/indemnity amounts)

\$ \_\_\_\_\_

ND

7. **TOTAL indemnity paid:**  
(i.e. sum of indemnity payments made on behalf of defendant(s) insured by your company)

\$ \_\_\_\_\_

ND

8. Details of indemnity payment(s)

*Disposition code:*

1 = Dropped/Denied/Dismissed

2 = Settled

3 = Defense Verdict

4 = Plaintiff Verdict

| Defendant #              | Date of Closure | Disposition Code | Indemnity Allocation<br>(i.e. % of total from Q8) |
|--------------------------|-----------------|------------------|---------------------------------------------------|
| Defendant #1             | □□/□□/□□□□      | □                | _____ %                                           |
| Defendant #2             | □□/□□/□□□□      | □                | _____ %                                           |
| Defendant #3             | □□/□□/□□□□      | □                | _____ %                                           |
| Defendant #4             | □□/□□/□□□□      | □                | _____ %                                           |
| Defendant #5             | □□/□□/□□□□      | □                | _____ %                                           |
| Defendant #6             | □□/□□/□□□□      | □                | _____ %                                           |
| <input type="radio"/> ND |                 |                  |                                                   |

9. Patient's date of birth:

/ / 

ND

10. Patient's zip code (home/residence):

ND

11. Patient's insurance status:

Private insurance

Medicare

Medicaid

Uninsured

Other (specify): \_\_\_\_\_

ND

12. Did the initial event that gave rise to the claim occur, in part or whole, during an **inpatient** stay?

Yes

No

13. Specify the **pre-event** ICD9 Code (if multiple codes, choose primary one)

ND

14. Was the incident related to a **procedure** or **procedures**:

Yes

No (**Skip to 16**)

15. If yes, please specify the CPT code for the procedure(s):

CPT Code (#1):   ND

CPT Code (#2):   ND

CPT Code (#3):   ND

16. What was the **insurer's** categorization of the degree of **disability** attributable to the **patient's** alleged injury or poor outcome?

- No injury
- Emotional disability only: (e.g. fright; no physical damage)
- Temporary insignificant: (e.g. lacerations, contusions, minor scars, rash; no delay in recovery)
- Temporary minor: (e.g. infections, missed fracture, fall in hospital; recovery delayed)
- Temporary major: (e.g. burns, surgical material left, drug side effect, brain damage; recovery delayed)
- Permanent minor: (e.g. loss of fingers, loss or damage to organs, includes non-disabling injuries)
- Permanent significant: (e.g. deafness, loss of limb, loss of eye, loss of one kidney or lung)
- Permanent major: (e.g. paraplegia, blindness, loss of two limbs, brain damage)
- Permanent grave: (e.g. quadriplegia, severe brain damage, lifelong care, fatal prognosis)
- Death
- Injury, but no categorization of severity evident

**SPECIALTY CODES***MMM. Unknown***Generalist Physicians\***

101. Generalist/Primary Care (includes: Internal Medicine, Hospitalist, General Practice, Family Practice, General Primary Care)

**Specialist Physicians\***

|                              |                                           |
|------------------------------|-------------------------------------------|
| 201. Cardiology              | 212. Geriatrics                           |
| 202. Hematology/Oncology     | 213. Genetics                             |
| 203. Nephrology              | 214. Occupational Medicine                |
| 204. Neurology               | 215. Physical Medicine & Rehab/Psychiatry |
| 205. Rheumatology/Immunology | 216. Obstetrics/Gynecology                |
| 206. Gastroenterology        | 217. Anesthesiology                       |
| 207. Dermatology             | 218. Pediatrics/Neonatology               |
| 208. Endocrinology           | 219. Radiology/Imaging                    |
| 209. Pulmonary Disease       | 220. Pathology                            |
| 210. Infectious Disease      | 221. Emergency Medicine                   |
| 211. Intensive Care          | 222. Psychiatry                           |

**Surgeons\***

|                              |                       |
|------------------------------|-----------------------|
| 301. General Surgery         | 306. Vascular Surgery |
| 302. Orthopedic Surgery      | 307. Neurosurgery     |
| 303. Cardio/Thoracic Surgery | 308. Plastic Surgery  |
| 304. Ophthalmology           | 309. Urology          |
| 305. ENT                     |                       |

**\*For Fellows list relevant 3-digit code and place “F” in 4<sup>th</sup> box, for Residents list relevant 3-digit code and place “R” in 4<sup>th</sup> box, and for Interns list relevant 3-digit code and place “I” in 4<sup>th</sup> box.**

**Nursing Professionals**

401. Registered Nurse  
 402. Licensed Practical Nurse  
 403. Nurse Practitioner/Clinical Nurse Specialist  
 404. Nurse Midwife  
 405. Nurse Anesthetist

**Other Professional Services**

|                                      |                                         |
|--------------------------------------|-----------------------------------------|
| 501. Dentistry/Oral Surgery          | 510. Naturopathy (by MD/DO)             |
| 502. Substance Abuse Treatment       | 511. Naturopathy (by non-physician)     |
| 503. Physical Therapy                | 512. Massage Therapy (by MD/DO)         |
| 504. Occupational Therapy            | 513. Massage Therapy (by non-physician) |
| 505. Speech Therapy                  | 514. Homeopathy (by MD/DO)              |
| 506. Acupuncture (by MD/DO)          | 515. Homeopathy (by non-physician)      |
| 507. Acupuncture (by non-physician)  | 516. Physician Assistant                |
| 508. Chiropractic (by MD/DO)         | 517. Pharmacist                         |
| 509. Chiropractic (by non-physician) | 518. Patient Care Assistants            |
|                                      | 519. Other health professional          |

**Trainee**

601. Medical student  
 602. Nursing Student (graduate or undergraduate)  
 603. Student of other health profession
