# Supplementary material
Source: HighWire-hosted journal article supplement (https://www.annals.org/content/suppl/2006/09/27/145.7.488)
Supplement: zai019062195A002.pdf [file zai019062195A002.pdf]

1c. Adverse outcome:

---

---

---

---

---

---

---

### **Adverse Outcome:**

**The following question relates to the adverse outcome experienced by the plaintiff in this claim. You should answer this question *without regard* to whether you believe the adverse outcome was due to an error or some other cause.**

2. Which of the following adverse outcomes did the **plaintiff** experience in this claim? (Specify **all** that apply)
- An alteration in the management of the patient
  - Disability (including significant emotional disability)
  - Hospital admission
  - Prolonged hospital stay
  - Death
  - Breach of informed consent (whether actual or alleged)
  - None of the above

**If you marked “None of the above” for  
Question 2 (above) – STOP REVIEW**

3. In **your judgment**, what was the degree of **disability** attributable to the **injury** (if any) in this claim?
- No injury
  - Emotional disability only: (e.g. fright; no physical damage)
  - Temporary insignificant: (e.g. lacerations, contusions, minor scars, rash; no delay in recovery)
  - Temporary minor: (e.g. infections, missed fracture, fall in hospital; recovery delayed)

- o Temporary major: (e.g. burns, surgical material left, drug side effect, brain damage; recovery delayed)
- o Permanent minor: (e.g. loss of fingers, loss or damage to organs includes non-disabling injuries)
- o Permanent significant: (e.g. deafness, loss of limb, loss of eye, loss of one kidney or lung)
- o Permanent major: (e.g. paraplegia, blindness, loss of two limbs, brain damage)
- o Permanent grave: (e.g. quadriplegia, severe brain damage, lifelong care, or fatal prognosis)
- o Death
- o Injury, but no categorization of severity evident
