# Supplementary material
Source: HighWire-hosted journal article supplement (https://www.annals.org/content/suppl/2006/09/27/145.7.488)
Supplement: zai019062195A004.pdf [file zai019062195A004.pdf]

# Malpractice Insurers Medical Error Prevention Study MISSED/DELAYED DIAGNOSIS DATA FORM

Subject Number (FOR OFFICE USE ONLY)

Date of Review

Insurance Company Code Number

Claim Number

Reviewer ID #

**MISSED/DELAYED DIAGNOSIS-RELATED ERROR:** An error(s) in the outpatient setting resulting either from (1) error in diagnosis which caused delay in appropriate treatment or needed surgery; or (2) a failure to act or follow-up on diagnostic test results. These error(s) can include system-attributable, clinician-attributable and patient-attributable causes.

1. Please categorize the type of clinical diagnosis that was either missed or delayed?

| Yes                   | No                    | Missed or Delayed Diagnoses |
|-----------------------|-----------------------|-----------------------------|
| <input type="radio"/> | <input type="radio"/> | Myocardial Infarction       |
| <input type="radio"/> | <input type="radio"/> | Aneurysm                    |
| <input type="radio"/> | <input type="radio"/> | Embolism                    |
| <input type="radio"/> | <input type="radio"/> | Fracture                    |
| <input type="radio"/> | <input type="radio"/> | Appendicitis                |
| <input type="radio"/> | <input type="radio"/> | Infection                   |
| <input type="radio"/> | <input type="radio"/> | Breast Cancer               |
| <input type="radio"/> | <input type="radio"/> | Brain Cancer                |
| <input type="radio"/> | <input type="radio"/> | Colorectal Cancer           |
| <input type="radio"/> | <input type="radio"/> | Hematologic Cancer          |
| <input type="radio"/> | <input type="radio"/> | Gynecological Cancer        |
| <input type="radio"/> | <input type="radio"/> | Prostate Cancer             |
| <input type="radio"/> | <input type="radio"/> | Liver and Gastric Cancer    |
| <input type="radio"/> | <input type="radio"/> | Other (specify): _____      |

- 1a. Was there a family history of the clinical condition for which the diagnosis was missed/delayed?
- Yes
  - No
  - ND

**Setting:**

2. What was the principal setting of the missed/delayed diagnosis-related error(s)? (Note **one** only)
- Emergency room
  - Mental health facility
  - Skilled nursing facility/rehabilitation facility
  - Nursing home
  - Ambulatory surgery
  - Outpatient procedure facility
  - Physician's office (including telephone/mail communication with a patient)
  - Community/retail pharmacy
  - Home health care
  - Interventional radiology/catheterization laboratory
  - Pathology/clinical laboratory
  - Endoscopy/procedure room
  - Patient's home
  - Other (out of hospital): \_\_\_\_\_
  - ND (out of hospital)

- 2a. Was the principal setting of the error(s) adult or pediatric?
- Adult
  - Pediatric
  - Both
  - ND

**If the Missed/delayed diagnosis occurred exclusively in hospital =====> STOP**

### Personnel Involved:

3. Please identify all personnel involved in the error(s) and rate the importance of their contribution:  
(See scale below)

| Personnel Involved<br>( Specialty code list) |                      |                      |                      | Contributory<br>Role Rating<br>(See scale below) |                      |
|----------------------------------------------|----------------------|----------------------|----------------------|--------------------------------------------------|----------------------|
| 1.                                           | <input type="text"/> | <input type="text"/> | <input type="text"/> | <input type="text"/>                             | <input type="text"/> |
| 2.                                           | <input type="text"/> | <input type="text"/> | <input type="text"/> | <input type="text"/>                             | <input type="text"/> |
| 3.                                           | <input type="text"/> | <input type="text"/> | <input type="text"/> | <input type="text"/>                             | <input type="text"/> |
| 4.                                           | <input type="text"/> | <input type="text"/> | <input type="text"/> | <input type="text"/>                             | <input type="text"/> |
| 5.                                           | <input type="text"/> | <input type="text"/> | <input type="text"/> | <input type="text"/>                             | <input type="text"/> |
| 6.                                           | <input type="text"/> | <input type="text"/> | <input type="text"/> | <input type="text"/>                             | <input type="text"/> |

#### SCORING

|                    |                                                                                                    |
|--------------------|----------------------------------------------------------------------------------------------------|
| Contributory Role: | 1-----2-----3-----4-----5                                                                          |
|                    | Somewhat Important                      Moderately Important                      Highly Important |

4. Did some behavior by the **patient** contribute to the missed/delayed diagnosis?
- Yes
  - No
  - ND

**Time Sequence:**

5. With the benefit of hindsight, when was the **first opportunity** to begin the process of making this diagnosis?

(Note the **earliest date** found)

**Date:**

/   /      
DD MM Y Y Y Y

ND

**If relevant, the earliest time**

**Time:**

24-hr format

ND

- 5a. When would it have been **reasonable** for a provider to make the diagnosis?  
 (A range is acceptable)

**Date:**

/   /     [-    /   /     ]  
D D M M Y Y Y Y D D M M Y Y Y Y

Unable to answer due to insufficient data

ND

**Time:**

24-hr format

Not relevant considering timeline of missed/delayed diagnosis

ND

- 5b. When was the **final diagnosis** made?  
(Note the **earliest date** found)

**Date:**

o   /   /      
D D M M Y Y Y Y

- o ND

**Time:**

o     24-hr format

- o Not relevant considering timeline of missed/delayed diagnosis

- o ND

- 5c. Who was responsible for making that final diagnosis?

- o A provider noted in Q3:   
(See Question 3 and **identify one** based on ordered number, (i.e. 1 through 6). If more than one provider made the diagnosis, choose the leading diagnostician)

- o If not a provider in Q3, please specify provider specialty code:      
(Specialty code list)

- o ND

6. Please note all pre-existing medical conditions (**not** including the diagnosis alleged to have been missed)

| Yes                   | No                    | Pre-Existing Medical Conditions                                 |
|-----------------------|-----------------------|-----------------------------------------------------------------|
| <input type="radio"/> | <input type="radio"/> | Anemia                                                          |
| <input type="radio"/> | <input type="radio"/> | Asthma, emphysema, chronic bronchitis                           |
| <input type="radio"/> | <input type="radio"/> | Arthritis or rheumatism                                         |
| <input type="radio"/> | <input type="radio"/> | Back problems (including spine and disc)                        |
| <input type="radio"/> | <input type="radio"/> | Cancer, diagnosed in past three years                           |
|                       | <input type="radio"/> | Depression                                                      |
| <input type="radio"/> | <input type="radio"/> | Diabetes                                                        |
| <input type="radio"/> | <input type="radio"/> | Digestive problems (including ulcer, colitis, and gall bladder) |
| <input type="radio"/> | <input type="radio"/> | Heart trouble (angina, CHF, and CAD)                            |

|                       |                       |                                      |
|-----------------------|-----------------------|--------------------------------------|
| <input type="radio"/> | <input type="radio"/> | High blood pressure (hypertension)   |
| <input type="radio"/> | <input type="radio"/> | HIV illness or AIDS                  |
| <input type="radio"/> | <input type="radio"/> | Kidney disease                       |
| <input type="radio"/> | <input type="radio"/> | Liver problems (including cirrhosis) |
| <input type="radio"/> | <input type="radio"/> | Stroke                               |
| <input type="radio"/> | <input type="radio"/> | Other (specify): _____               |

### Origin of the Missed or Delayed Diagnosis:

Please complete the following series of questions and consider that a missed /delayed diagnosis-related error(s) might be due to multiple factors. The factors addressed in this section are:

*Care not sought in a timely manner*

*History/physical examination*

*Failure to order diagnostic/laboratory tests*

*Diagnostic/laboratory tests ordered but not performed (i.e. at all, or in a timely manner)*

*Diagnostic/laboratory tests not performed correctly*

*Diagnostic/laboratory tests not interpreted correctly*

*Diagnostic/laboratory tests not received*

*Diagnostic/laboratory results not transmitted to the patient*

*Inappropriate/inadequate follow-up plans*

*Patient non-compliance*

7. **Rate the *likelihood* that an initial delay by the patient in seeking care contributed to the error(s):**

|                 |                           |                 |   |   |               |
|-----------------|---------------------------|-----------------|---|---|---------------|
| 0               | 0                         | 0               | 0 | 0 | 0             |
| 0               | 1-----2-----3-----4-----5 |                 |   |   |               |
| Inadequate Data | Highly Unlikely           | Somewhat Likely |   |   | Highly Likely |

*If the likelihood rating is < 3 (i.e. 0, 1, or 2), skip to question 8*

- 7a. Why didn't the patient seek care in a timely manner?  
(Select **all** that apply)

- Patient didn't realize that he/she should seek care
- No health insurance
- No access to suitable provider (defined as: no suitable providers identified within the community setting)
- Lack of transportation
- Didn't think it was necessary
- Couldn't get appointment
- Forgot to arrange an appointment
- Had an appointment, but didn't show

- Had an appointment, but provider postponed/cancelled
- Other (specify): \_\_\_\_\_
- ND

8. **Rate the *likelihood* that a failure to obtain an adequate (or any) medical history contributed to the error(s):**

|                       |                           |                       |                       |                       |                       |
|-----------------------|---------------------------|-----------------------|-----------------------|-----------------------|-----------------------|
| <input type="radio"/> | <input type="radio"/>     | <input type="radio"/> | <input type="radio"/> | <input type="radio"/> | <input type="radio"/> |
| 0                     | 1-----2-----3-----4-----5 |                       |                       |                       |                       |
| Inadequate Data       | Highly Unlikely           |                       | Somewhat Likely       |                       | Highly Likely         |

*If the likelihood rating is < 3, skip to question 9*

8a. Why wasn't an appropriate medical history obtained?  
(Select **all** that apply)

**Patient related:**

- Didn't schedule appointment
- Couldn't schedule appointment
- Missed appointment
- Cancelled appointment
- Failure of patient to provide accurate medical history
- Language barrier
- Patient declined
- Other (specify): \_\_\_\_\_
- ND

**Provider related:**

- Cancelled/postponed appointment
- Failure to elicit relevant information
- Lack of sufficient time
- Lack of knowledge
- Poor documentation
- Failure of communication between provider and patient
- Other (Specify): \_\_\_\_\_
- ND

9. **Rate the *likelihood* that an inadequate (or no) physical examination contributed to the error(s).**

|                 |                           |                 |   |               |   |
|-----------------|---------------------------|-----------------|---|---------------|---|
| 0               | 0                         | 0               | 0 | 0             | 0 |
| 0               | 1-----2-----3-----4-----5 |                 |   |               |   |
| Inadequate Data | Highly Unlikely           | Somewhat Likely |   | Highly Likely |   |

*If the likelihood rating is < 3, skip to question 10*

- 9a. Why wasn't an adequate physical examination performed?  
(Select **all** that apply)

**Patient related:**

- Didn't schedule appointment
- Couldn't schedule appointment
- Missed appointment
- Cancelled appointment
- Language barrier
- Patient declined
- Other (specify): \_\_\_\_\_
- ND

**Provider related:**

- Incomplete physical examination
- Lack of sufficient time
- Lack of knowledge
- Poor documentation
- Failure of communication between provider and patient
- Other (specify): \_\_\_\_\_
- ND

10. **Rate the *likelihood* that failure to order appropriate diagnostic/laboratory tests contributed to the error(s).**

|                 |                           |                 |   |               |   |
|-----------------|---------------------------|-----------------|---|---------------|---|
| 0               | 0                         | 0               | 0 | 0             | 0 |
| 0               | 1-----2-----3-----4-----5 |                 |   |               |   |
| Inadequate Data | Highly Unlikely           | Somewhat Likely |   | Highly Likely |   |

*If the likelihood rating is < 3, skip to question 11*

- 10a. Why weren't diagnostic/laboratory tests **ordered**?  
(Select **all** that apply)

**Patient related:**

- Didn't schedule appointment
- Couldn't schedule appointment

- Missed appointment
- Cancelled appointment
- Language barrier
- Patient declined
- Other (specify): \_\_\_\_\_
- ND

**Provider related:**

- Cancelled/postponed appointment
- Failure of communication between provider and laboratory staff
- Failure of communication among members of laboratory staff
- Failure of communication among providers
- Failure of communication between provider and patient
- Lack of sufficient time
- Did not believe tests were required
- Lack of knowledge
- Poor documentation
- Other (specify): \_\_\_\_\_
- ND

- 10b. What was the main diagnostic/laboratory test in question?  
(Select **all** that apply)

**Radiographic:**

- CT
- MRI
- X-ray
- Mammogram
- Ultrasound
- Bone scan
- VQ scan
- Other (specify): \_\_\_\_\_

**Blood Work:**

- Arterial blood gas
- Chemistries (including glucose, liver and kidney function tests)
- Hematologies (CBC)
- Blood cultures
- Coagulation tests (PT, PTT)
- Cancer testing (CA125, PSA, CEA)
- Other (specify): \_\_\_\_\_

**Other:**

- Urinalysis/culture
- EKG
- Echocardiogram
- Cardiac catheterization
- Colonoscopy/flexible sigmoidoscopy
- Stool guaiac cards
- EGD/Barium swallow
- Biopsy
- Other (Specify): \_\_\_\_\_
- ND

11. **Rate the *likelihood* that adequate diagnostic/laboratory tests being ordered but not performed contributed to the error(s):**

|                       |                           |                       |                       |                       |                       |
|-----------------------|---------------------------|-----------------------|-----------------------|-----------------------|-----------------------|
| <input type="radio"/> | <input type="radio"/>     | <input type="radio"/> | <input type="radio"/> | <input type="radio"/> | <input type="radio"/> |
| 0                     | 1-----2-----3-----4-----5 |                       |                       |                       |                       |
| Inadequate Data       | Highly Unlikely           |                       | Somewhat Likely       |                       | Highly Likely         |

***If the likelihood rating is <3, skip to question 12***

- 11a. Why weren't the diagnostic/laboratory performed?  
(Select **all** that apply)

**Patient related:**

- Patient didn't know
- Didn't schedule appointment
- Couldn't schedule appointment
- Missed appointment
- Cancelled appointment
- Instructions unclear
- Instructions not followed
- Language barrier
- Patient declined
- Other (specify): \_\_\_\_\_
- ND

**Provider related:**

- Not aware that the test(s) not performed
- Cancelled/postponed appointment
- Equipment failure
- Inexperienced staff
- Failure to provide pre-test instructions
- Inadequate follow-up plan

- Error in clinical judgment
- Misinterpretation of clinical test results
- Failure of communication between provider and laboratory staff
- Failure of communication among laboratory staff
- Failure of communication among providers
- Failure of communication between provider and patient
- Wrong patient
- Wrong test
- Other (specify): \_\_\_\_\_
- ND

11b. What was the main diagnostic/laboratory test in question?  
(Select **all** that apply)

**Radiographic:**

- CT
- MRI
- X-ray
- Mammogram
- Ultrasound
- Bone scan
- VQ scan
- Other (specify): \_\_\_\_\_

**Blood Work:**

- Arterial blood gas
- Chemistries (including glucose, liver and kidney function tests)
- Hematologies (CBC)
- Blood cultures
- Coagulation tests (PT, PTT)
- Cancer testing (AFP, CA125, PSA)
- Other (specify): \_\_\_\_\_

**Other:**

- Urinalysis/culture
- EKG
- Echocardiogram
- Cardiac catheterization
- Colonoscopy/flexible sigmoidoscopy
- Stool guaiac cards
- EGD/Barium swallow
- Biopsy
- Other (specify): \_\_\_\_\_
- ND

12. Rate the *likelihood* that diagnostic/laboratory tests not performed correctly contributed to the error(s):

|                 |                           |   |                 |   |               |
|-----------------|---------------------------|---|-----------------|---|---------------|
| 0               | 0                         | 0 | 0               | 0 | 0             |
| 0               | 1-----2-----3-----4-----5 |   |                 |   |               |
| Inadequate Data | Highly Unlikely           |   | Somewhat Likely |   | Highly Likely |

*If the likelihood rating is < 3, skip to question 13*

- 12a. Why weren't diagnostic/laboratory tests performed correctly?  
(Select **all** that apply)

**Patient related:**

- Didn't schedule appointment
- Couldn't schedule appointment
- Missed appointment
- Cancelled appointment
- Language barrier
- Patient declined
- Other (specify): \_\_\_\_\_
- ND

**Provider related:**

- Cancelled/postponed appointment
- Equipment failure
- Inexperienced staff
- Mislabeled specimen
- Failure to provide pre-test instructions
- Error in clinical judgment
- Failure of communication between provider and laboratory staff
- Failure of communication among laboratory staff
- Failure of communication among providers
- Failure of communication between provider and patient
- Wrong patient
- Wrong test
- Other (specify): \_\_\_\_\_
- ND

- 12b. What was the main diagnostic/laboratory test in question?  
(Select **all** that apply)

**Radiographic:**

- CT
- MRI
- X-ray
- Mammogram
- Ultrasound
- Bone scan
- VQ scan
- Other (specify): \_\_\_\_\_

**Blood Work:**

- Arterial blood gas
- Chemistries (including glucose, liver and kidney function tests)
- Hematologies (CBC)
- Blood cultures
- Coagulation tests (PT, PTT)
- Cancer testing (AFP, CA125, PSA)
- Other (specify): \_\_\_\_\_

**Other:**

- Urinalysis/culture
- EKG
- Echocardiogram
- Cardiac catheterization
- Colonoscopy/flexible sigmoidoscopy
- Stool guaiac cards
- EGD/Barium swallow
- Biopsy
- Other (specify): \_\_\_\_\_
- ND

13. Rate the *likelihood* that incorrect interpretation of diagnostic/laboratory tests contributed to the error(s):

|                 |                           |                 |   |   |               |
|-----------------|---------------------------|-----------------|---|---|---------------|
| ○               | ○                         | ○               | ○ | ○ | ○             |
| 0               | 1-----2-----3-----4-----5 |                 |   |   |               |
| Inadequate Data | Highly Unlikely           | Somewhat Likely |   |   | Highly Likely |

*If the likelihood rating is < 3, skip to question 14*

- 13a. Who was responsible for the **incorrect interpretation of the diagnostic/laboratory results?**  
(Specialty code list)

Specialty code:

Specialty code:

Specialty code:

No specialty (i.e. Non clinician) specify: \_\_\_\_\_

- 13b. Why weren't the diagnostic/laboratory tests interpreted correctly?  
(Select **all** that apply)

**Provider related:**

- Cancelled/postponed appointment
- Equipment failure
- Inexperienced staff
- Failure to provide pre-test instructions
- Error in clinical judgment
- Misinterpretation of clinical test results
- Failure of communication between provider and laboratory staff
- Failure of communication among laboratory staff
- Failure of communication among providers
- Failure of communication between provider and patient
- Wrong patient
- Wrong test
- Other (specify): \_\_\_\_\_
- ND

14. **Rate the *likelihood* that the responsible provider not receiving diagnostic/laboratory test results contributed to the error(s):**

|                 |                           |                 |   |   |               |
|-----------------|---------------------------|-----------------|---|---|---------------|
| 0               | 0                         | 0               | 0 | 0 | 0             |
| 0               | 1-----2-----3-----4-----5 |                 |   |   |               |
| Inadequate Data | Highly Unlikely           | Somewhat Likely |   |   | Highly Likely |

*If the likelihood rating is < 3, skip to question 15*

- 14a. Why didn't the responsible provider receive the diagnostic/laboratory test results?  
(Select **all** that apply)

**Provider related:**

- Cancelled/postponed appointment
- Equipment failure
- Inexperienced staff
- Failure to provide pre-test instructions
- Inadequate follow-up plan
- Error in clinical judgment
- Failure of communication between provider and radiology/laboratory staff
- Failure of communication among laboratory staff
- Failure of communication among providers
- Failure of communication between provider and patient
- Wrong patient
- Wrong test
- Providers relocated or changed
- Information lost by mail/clinic
- Inadequate test result tracking system in clinic
- Other (specify): \_\_\_\_\_
- ND

- 14b. What was the result?  
(Note **one** only)

- Normal, no further follow-up required
- Normal, yet additional follow-up required
- Abnormal, immediate attention required
- Abnormal, additional follow-up required
- ND

15. **Rate the *likelihood* that diagnostic/laboratory results not transmitted to the patient contributed to the error(s):**

|                 |                           |   |                 |   |               |
|-----------------|---------------------------|---|-----------------|---|---------------|
| ○               | ○                         | ○ | ○               | ○ | ○             |
| 0               | 1-----2-----3-----4-----5 |   |                 |   |               |
| Inadequate Data | Highly Unlikely           |   | Somewhat Likely |   | Highly Likely |

*If the likelihood rating is < 3, skip to question 16*

15a. Why weren't the diagnostic/laboratory test results transmitted to the patient?  
(Select **all** that apply)

- Responsible provider did not have test results
- Normal value, no need to communicate
- Provider forgot (inadequate tracking system)
- Patient missed appointment
- Patient lost to follow-up (wrong address, no address...)
- Language barrier
- Other (specify): \_\_\_\_\_
- ND

15b. What was the result?  
(Note **one** only)

- Normal, no further follow-up required
- Normal, yet additional follow-up required
- Abnormal, immediate attention required
- Abnormal, additional follow-up required
- ND

16. **Rate the *likelihood* that an inappropriate/inadequate follow-up plan contributed to the error(s):**

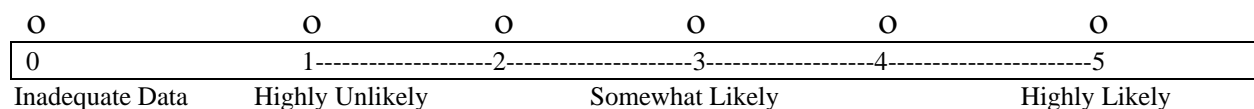

***If the likelihood rating is < 3, skip to question 17***

16a. Why was the follow-up plan inappropriate/inadequate?  
(Select **all** that apply)

- Follow-up plan not documented
- Provider didn't think further follow-up was necessary
- Provider selected inappropriate interval for follow-up
- Provider lack of knowledge re: clinical condition
- Patient lost to follow-up (wrong address, no address...)
- Miscommunication between patient and provider(s)
- Miscommunication between providers
- Unclear patient symptoms/history
- Follow-up appointment not scheduled
- Other (specify): \_\_\_\_\_
- ND

17. Rate the *likelihood* that a failure to refer contributed to the error(s):

|                 |                           |   |                 |   |               |
|-----------------|---------------------------|---|-----------------|---|---------------|
| 0               | 0                         | 0 | 0               | 0 | 0             |
| 0               | 1-----2-----3-----4-----5 |   |                 |   |               |
| Inadequate Data | Highly Unlikely           |   | Somewhat Likely |   | Highly Likely |

*If the likelihood rating is < 3, skip to question 18*

17a. To whom **should** the referral have been made?  
(Specialty code list)

Specialty code:

Specialty code:

Specialty code:

No specialty (i.e. Non clinician) specify: \_\_\_\_\_

17b. Why was the referral not made?  
(Select **all** that apply)**Patient related:**

- Didn't schedule appointment
- Couldn't schedule appointment
- Missed appointment
- Cancelled appointment
- Language barrier
- Patient declined
- Other (specify): \_\_\_\_\_
- ND

**Provider related:**

- Cancelled/postponed appointment
- Failure of communication between provider and laboratory staff
- Failure of communication among members of laboratory staff
- Failure of communication among providers
- Failure of communication between provider and patient
- Lack of sufficient time
- Did not believe tests were required
- Lack of knowledge

- o Poor documentation
- o Other (specify): \_\_\_\_\_
- o ND

18. **Rate the *likelihood* that the failure of a requested referral to occur contributed to the error(s):**

|                 |                           |   |                 |   |               |
|-----------------|---------------------------|---|-----------------|---|---------------|
| 0               | 0                         | 0 | 0               | 0 | 0             |
| 0               | 1-----2-----3-----4-----5 |   |                 |   |               |
| Inadequate Data | Highly Unlikely           |   | Somewhat Likely |   | Highly Likely |

*If the likelihood rating is < 3, skip to question 19*

18a. To whom was the referral made?  
(Specialty code list)

Specialty code:

Specialty code:

Specialty code:

o No specialty (i.e. Non clinician) specify: \_\_\_\_\_

18b. Why did the requested referral visit **not** occur?  
(Select **all** that apply)

**Patient related:**

- o Patient didn't know
- o Didn't schedule appointment
- o Couldn't schedule appointment
- o Missed appointment
- o Cancelled appointment
- o Instructions unclear
- o Instructions not followed
- o Language barrier
- o Patient declined
- o Other (specify): \_\_\_\_\_
- o ND

**Provider related:**

- o Not aware that the test(s) not performed
- o Cancelled/postponed appointment

- o Equipment failure
- o Inexperienced staff
- o Failure to provide pre-test instructions
- o Inadequate follow-up plan
- o Error in clinical judgment
- o Misinterpretation of clinical test results
- o Failure of communication between provider and laboratory staff
- o Failure of communication among laboratory staff
- o Failure of communication among providers
- o Failure of communication between provider and patient
- o Wrong patient
- o Wrong test
- o Other (specify): \_\_\_\_\_
- o ND

19. **Rate the *likelihood* that failure of the referred-to clinician to convey relevant results to the referring clinician contributed to the error(s):**

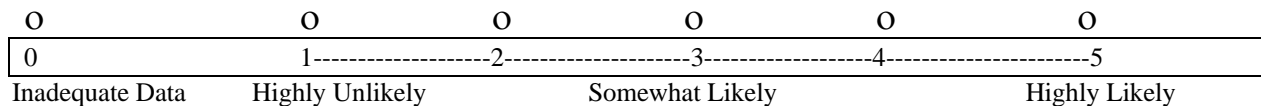

***If the likelihood rating is < 3, skip to question 20***

19a. What was the specialty of the clinician to whom the referral was made?  
(Specialty code list)

Specialty code:

Specialty code:

Specialty code:

o No specialty (i.e. Non clinician) specify: \_\_\_\_\_

19b. Why weren't the results transmitted?  
(Select **all** that apply)

**Provider related:**

- o Cancelled/postponed appointment
- o Equipment failure
- o Inexperienced staff
- o Failure to provide pre-test instructions

- Inadequate follow-up plan
- Error in clinical judgment
- Failure of communication between provider and radiology/laboratory staff
- Failure of communication among laboratory staff
- Failure of communication among providers
- Failure of communication between provider and patient
- Wrong patient
- Wrong test
- Providers relocated or changed
- Information lost by mail/clinic
- Inadequate test result tracking system in clinic
- Other (specify): \_\_\_\_\_
- ND

20. **Rate the *likelihood* that patient non-compliance with the follow-up plan contributed to the error(s):**

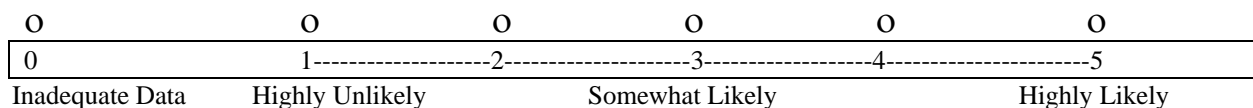

***If the likelihood rating is < 3 or greater, STOP***

20a. How was the patient non-compliant?  
(Select **all** that apply)

- Didn't schedule appointment
- Couldn't schedule appointment
- Missed appointment
- Cancelled appointment
- Missed/cancelled tests
- Non-adherence to medications
- Other (specify): \_\_\_\_\_
- ND

20b. Why was the patient non-compliant?  
(Select **all** that apply)

**Patient related:**

- Language barrier
- Patient declined/refused
- Lack of knowledge of plan
- Other (specify): \_\_\_\_\_
- ND

**SPECIALTY CODES***MMM. Unknown***Generalist Physicians\***

101. Generalist/Primary Care (includes: Internal Medicine, Hospitalist, General Practice, Family Practice, General Primary Care)

**Specialist Physicians\***

|                              |                                           |
|------------------------------|-------------------------------------------|
| 201. Cardiology              | 212. Geriatrics                           |
| 202. Hematology/Oncology     | 213. Genetics                             |
| 203. Nephrology              | 214. Occupational Medicine                |
| 204. Neurology               | 215. Physical Medicine & Rehab/Psychiatry |
| 205. Rheumatology/Immunology | 216. Obstetrics/Gynecology                |
| 206. Gastroenterology        | 217. Anesthesiology                       |
| 207. Dermatology             | 218. Pediatrics/Neonatology               |
| 208. Endocrinology           | 219. Radiology/Imaging                    |
| 209. Pulmonary Disease       | 220. Pathology                            |
| 210. Infectious Disease      | 221. Emergency Medicine                   |
| 211. Intensive Care          | 222. Psychiatry                           |

**Surgeons\***

|                              |                       |
|------------------------------|-----------------------|
| 301. General Surgery         | 306. Vascular Surgery |
| 302. Orthopedic Surgery      | 307. Neurosurgery     |
| 303. Cardio/Thoracic Surgery | 308. Plastic Surgery  |
| 304. Ophthalmology           | 309. Urology          |
| 305. ENT                     |                       |

**\*For Fellows list relevant 3-digit code and place "F" in 4<sup>th</sup> box, for Residents list relevant 3-digit code and place "R" in 4<sup>th</sup> box, and for Interns list relevant 3-digit code and place "I" in 4<sup>th</sup> box.**

**Nursing Professionals**

401. Registered Nurse  
 402. Licensed Practical Nurse  
 403. Nurse Practitioner/Clinical Nurse Specialist  
 404. Nurse Midwife  
 405. Nurse Anesthetist

**Other Professional Services**

|                                      |                                         |
|--------------------------------------|-----------------------------------------|
| 501. Dentistry/Oral Surgery          | 510. Naturopathy (by MD/DO)             |
| 502. Substance Abuse Treatment       | 511. Naturopathy (by non-physician)     |
| 503. Physical Therapy                | 512. Massage Therapy (by MD/DO)         |
| 504. Occupational Therapy            | 513. Massage Therapy (by non-physician) |
| 505. Speech Therapy                  | 514. Homeopathy (by MD/DO)              |
| 506. Acupuncture (by MD/DO)          | 515. Homeopathy (by non-physician)      |
| 507. Acupuncture (by non-physician)  | 516. Physician Assistant                |
| 508. Chiropractic (by MD/DO)         | 517. Pharmacist                         |
| 509. Chiropractic (by non-physician) | 518. Patient Care Assistants            |
|                                      | 519. Other health professional          |

**Trainee**

601. Medical student  
 602. Nursing Student (graduate or undergraduate)  
 603. Student of other health profession
